# Supplementary material for: Disability and Recurrent Stroke Among Participants in Stroke Prevention Trials
Source: PubMed Central journal article supplement (PMC11259901; doi:10.1001/jamanetworkopen.2024.23677), 2024-07-19
Supplement: jamanetwopen-e2423677-s001.pdf [file jamanetwopen-e2423677-s001.pdf]

## Supplemental Online Content

de Havenon A, Viscoli C, Kleindorfer D, et al. Disability and recurrent stroke among participants in stroke prevention trials. *JAMA Netw Open*. 2024;7(7):e2423677. doi:10.1001/jamanetworkopen.2024.23677

**eFigure 1.** Flowchart of P<sub>Ro</sub>FESS Cohort Derivation

**eFigure 2.** Flowchart of IRIS Cohort Derivation

**eFigure 3.** Sankey Diagram Showing the Cross-Sectional Overlap of mRS and NIHSS Categories in the P<sub>Ro</sub>FESS Trial

**eFigure 4.** Sankey Diagram Showing the Cross-Sectional Overlap of mRS and NIHSS Categories in the IRIS Trial

**eTable 1.** MACE Outcomes in P<sub>Ro</sub>FESS and IRIS by Poststroke Categories of Modified Rankin Scale

**eTable 2.** Recurrent Stroke Outcomes in P<sub>Ro</sub>FESS and IRIS by Poststroke Categories of NIH Stroke Scale

**eTable 3.** MACE Outcomes in P<sub>Ro</sub>FESS and IRIS by Poststroke Categories of NIH Stroke Scale

**eTable 4.** Recurrent Stroke Outcomes in P<sub>Ro</sub>FESS and IRIS by Alternative Poststroke Categories of Modified Rankin Scale

**eTable 5.** MACE Outcomes in P<sub>Ro</sub>FESS and IRIS by Alternative Poststroke Categories of Modified Rankin Scale

This supplemental material has been provided by the authors to give readers additional information about their work.

**eFigure 1.** Flowchart of PProFESS cohort derivation.

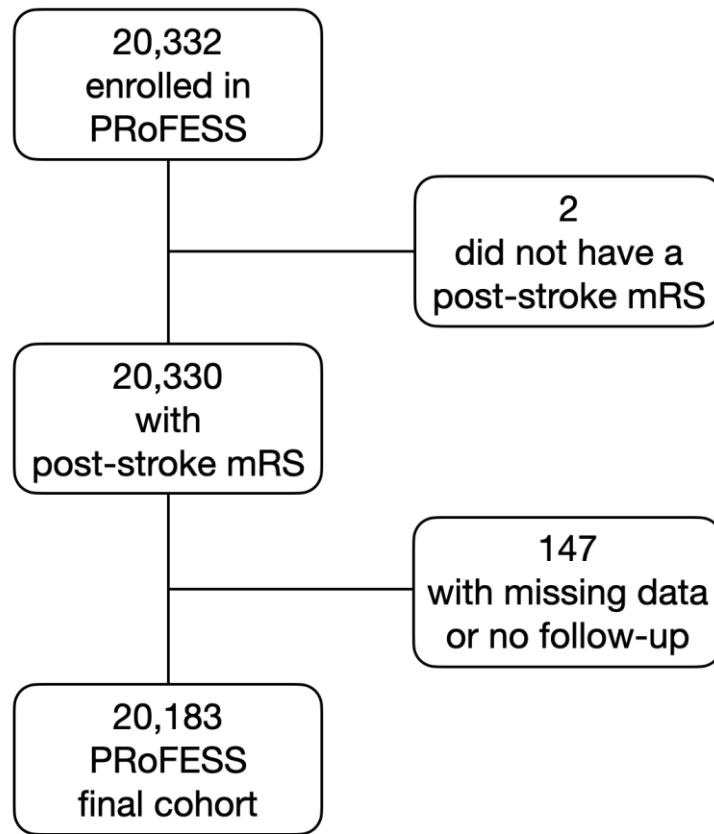

**eFigure 2.** Flowchart of IRIS cohort derivation.

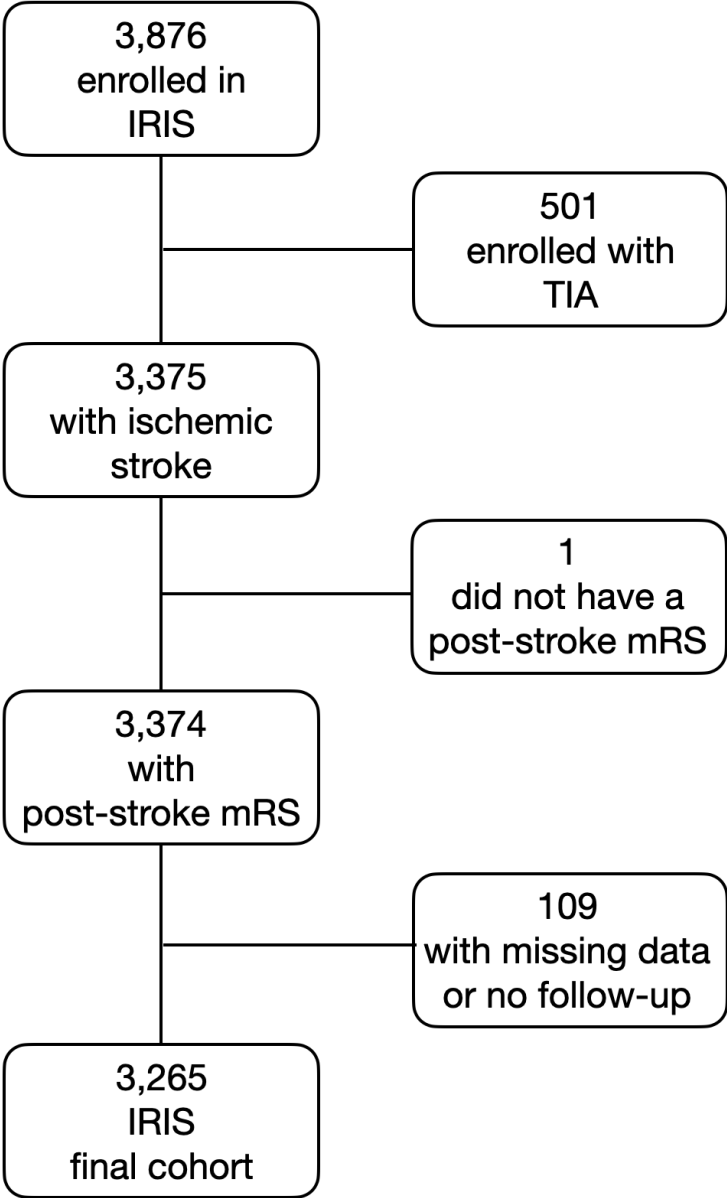

**eFigure 3.** Sankey diagram showing the cross-sectional overlap of mRS and NIHSS categories in the PRoFESS trial.

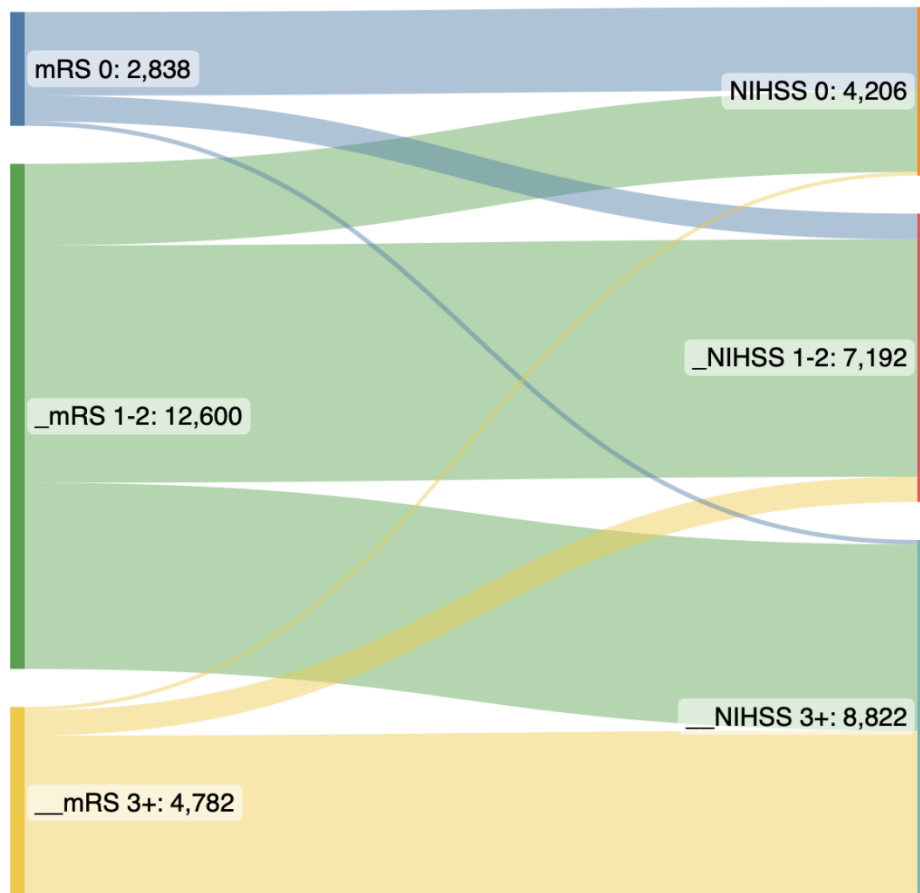

**eFigure 4.** Sankey diagram showing the cross-sectional overlap of mRS and NIHSS categories in the IRIS trial.

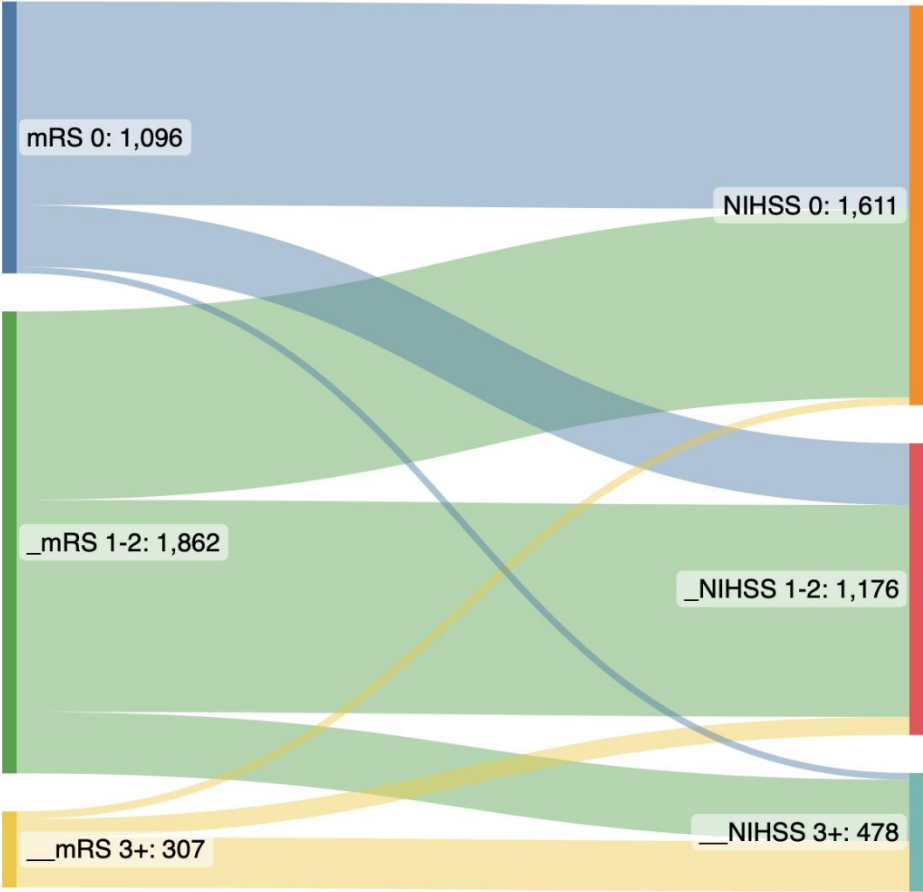

**eTable 1.** MACE outcomes in P<sub>RO</sub>FESS and IRIS by post-stroke categories of modified Rankin Scale.

|                           | <b>MACE event rate</b> | <b>Unadjusted hazard ratio (95% CI) for MACE*</b> | <b>P value</b> | <b>Adjusted hazard ratio (95% CI) for MACE*</b> | <b>P value</b> |
|---------------------------|------------------------|---------------------------------------------------|----------------|-------------------------------------------------|----------------|
| <b>P<sub>RO</sub>FESS</b> |                        |                                                   |                |                                                 |                |
| mRS 0 (n=2,834)           | 10.1%                  | Ref                                               | Ref            | Ref                                             | Ref            |
| mRS 1-2 (n=12,570)        | 12.2%                  | 1.27 (1.12-1.44)                                  | <0.001         | 1.21 (1.06-1.37)                                | 0.004          |
| mRS ≥3 (n=4,779)          | 17.2%                  | 1.90 (1.66-2.18)                                  | <0.001         | 1.62 (1.41-1.87)                                | <0.001         |
| <b>IRIS**</b>             |                        |                                                   |                |                                                 |                |
| mRS 0 (n=1,096)           | 10.9%                  | Ref                                               | Ref            | Ref                                             | Ref            |
| mRS 1-2 (n=1,862)         | 13.3%                  | 1.24 (1.00-1.55)                                  | 0.052          | 1.20 (0.98-1.53)                                | 0.113          |
| mRS ≥3 (n=307)            | 15.3%                  | 1.45 (1.03-2.03)                                  | 0.031          | 1.36 (0.96-1.94)                                | 0.085          |

\*From Cox model adjusted for baseline age, gender, race, country of enrollment, current smoking, atrial fibrillation, diabetes, hypertension, hyperlipidemia, prior stroke, randomization arm, days from qualifying stroke to enrollment, and TOAST classification of the qualifying stroke.

\*\*The proportional hazards assumption was not met for the adjusted model, resulting in a stratified Cox regression with strata for atrial fibrillation, country, and TOAST, after which we met the proportional hazards assumption.

**eTable 2.** Recurrent stroke outcomes in PRoFESS and IRIS by post-stroke categories of NIH Stroke Scale.

|                     | Stroke event rate | Unadjusted hazard ratio (95% CI) for stroke | P value | Adjusted hazard ratio (95% CI) for stroke* | P value |
|---------------------|-------------------|---------------------------------------------|---------|--------------------------------------------|---------|
| <b>PRoFESS</b>      |                   |                                             |         |                                            |         |
| NIHSS 0 (n=4,206)   | 7.7%              | Ref                                         | Ref     | Ref                                        | Ref     |
| NIHSS 1-2 (n=7,192) | 8.8%              | 1.18 (1.04-1.35)                            | 0.014   | 1.14 (0.99-1.30)                           | 0.062   |
| NIHSS ≥3 (n=8,822)  | 9.6%              | 1.33 (1.17-1.51)                            | <0.001  | 1.18 (1.04-1.35)                           | 0.013   |
| <b>IRIS</b>         |                   |                                             |         |                                            |         |
| NIHSS 0 (n=1,611)   | 6.8%              | Ref                                         | Ref     | Ref                                        | Ref     |
| NIHSS 1-2 (n=1,176) | 9.0%              | 1.44 (1.03-1.76)                            | 0.030   | 1.27 (0.97-1.67)                           | 0.080   |
| NIHSS ≥3 (n=478)    | 12.1%             | 1.84 (1.34-2.53)                            | <0.001  | 1.73 (1.24-2.40)                           | 0.001   |

\* Adjusted for baseline age, gender, race, region or country of enrollment, current smoking, atrial fibrillation, hypertension, hyperlipidemia, prior stroke, randomization arm, days from qualifying stroke to enrollment, and TOAST classification of the qualifying stroke. PRoFESS is also adjusted for diabetes.

**eTable 3.** MACE outcomes in P<sub>Ro</sub>FESS and IRIS by post-stroke categories of NIH Stroke Scale.

|                             | MACE event rate | Unadjusted hazard ratio (95% CI) for MACE* | P value | Adjusted hazard ratio (95% CI) for MACE* | P value |
|-----------------------------|-----------------|--------------------------------------------|---------|------------------------------------------|---------|
| <b>P<sub>Ro</sub>FESS**</b> |                 |                                            |         |                                          |         |
| NIHSS 0 (n=4,206)           | 11.0%           | Ref                                        | Ref     | Ref                                      | Ref     |
| NIHSS 1-2 (n=7,192)         | 12.1%           | 1.13 (1.01-1.26)                           | 0.039   | 1.10 (0.98-1.23)                         | 0.119   |
| NIHSS ≥3 (n=8,822)          | 14.9%           | 1.44 (1.30-1.60)                           | <0.001  | 1.32 (1.18-1.47)                         | <0.001  |
| <b>IRIS***</b>              |                 |                                            |         |                                          |         |
| NIHSS 0 (n=1,611)           | 11.7%           | Ref                                        | Ref     | Ref                                      | Ref     |
| NIHSS 1-2 (n=1,176)         | 12.8%           | 1.11 (0.90-1.38)                           | 0.340   | 1.02 (0.83-1.30)                         | 0.873   |
| NIHSS ≥3 (n=478)            | 15.7%           | 1.38 (1.06-1.80)                           | 0.019   | 1.23 (0.93-1.63)                         | 0.148   |

\*From Cox model adjusted for baseline age, gender, race, country of enrollment, current smoking, atrial fibrillation, diabetes, hypertension, hyperlipidemia, prior stroke, randomization arm, days from qualifying stroke to enrollment, and TOAST classification of the qualifying stroke.

\*\*The proportional hazards assumption was not met for the adjusted model, resulting in a stratified Cox regression with strata for atrial fibrillation, treatment arm, and TOAST, after which we met the proportional hazards assumption.

\*\*\*The proportional hazards assumption was not met for the adjusted model, resulting in a stratified Cox regression with strata for smoking, country, and TOAST, after which we met the proportional hazards assumption.



**eTable 4.** Recurrent stroke outcomes in P<sub>Ro</sub>FESS and IRIS by alternative post-stroke categories of modified Rankin Scale (0-1 vs. 2 vs. ≥3).

|                           | Stroke event rate | Unadjusted hazard ratio (95% CI) for stroke | P value | Adjusted hazard ratio (95% CI) for stroke* | P value |
|---------------------------|-------------------|---------------------------------------------|---------|--------------------------------------------|---------|
| <b>P<sub>Ro</sub>FESS</b> |                   |                                             |         |                                            |         |
| mRS 0-1 (n=10,357)        | 8.0%              | Ref                                         | Ref     | Ref                                        | Ref     |
| mRS 2 (n=5,047)           | 9.2%              | 1.19 (1.06-1.33)                            | 0.003   | 1.11 (0.99-1.25)                           | 0.078   |
| mRS ≥3 (n=4,779)          | 10.6%             | 1.42 (1.27-1.59)                            | <0.001  | 1.22 (1.09-1.37)                           | 0.001   |
| <b>IRIS</b>               |                   |                                             |         |                                            |         |
| mRS 0-1 (n=2,324)         | 7.8%              | Ref                                         | Ref     | Ref                                        | Ref     |
| mRS 2 (n=634)             | 8.8%              | 1.12 (0.83-1.51)                            | 0.450   | 1.08 (0.80-1.46)                           | 0.629   |
| mRS ≥3 (n=307)            | 11.7%             | 1.54 (1.08-2.20)                            | 0.018   | 1.47 (1.02-2.12)                           | 0.038   |

\* Adjusted for baseline age, gender, race, region or country of enrollment, current smoking, atrial fibrillation, hypertension, hyperlipidemia, prior stroke, randomization arm, days from qualifying stroke to enrollment, and TOAST classification of the qualifying stroke. P<sub>Ro</sub>FESS is also adjusted for diabetes.

**eTable 5.** MACE outcomes in P<sub>Ro</sub>FESS and IRIS by alternative post-stroke categories of modified Rankin Scale (0-1 vs. 2 vs. ≥3).

|                           | <b>MACE event rate</b> | <b>Unadjusted hazard ratio (95% CI) for MACE*</b> | <b>P value</b> | <b>Adjusted hazard ratio (95% CI) for MACE*</b> | <b>P value</b> |
|---------------------------|------------------------|---------------------------------------------------|----------------|-------------------------------------------------|----------------|
| <b>P<sub>Ro</sub>FESS</b> |                        |                                                   |                |                                                 |                |
| mRS 0-1 (n=10,357)        | 11.2%                  | Ref                                               | Ref            | Ref                                             | Ref            |
| mRS 2 (n=5,047)           | 13.1%                  | 1.21 (1.10-1.33)                                  | <0.001         | 1.15 (1.05-1.27)                                | 0.004          |
| mRS ≥3 (n=4,779)          | 17.2%                  | 1.67 (1.53-1.83)                                  | <0.001         | 1.46 (1.33-1.60)                                | <0.001         |
| <b>IRIS</b>               |                        |                                                   |                |                                                 |                |
| mRS 0-1 (n=2,324)         | 12.1%                  | Ref                                               | Ref            | Ref                                             | Ref            |
| mRS 2 (n=634)             | 13.6%                  | 1.13 (0.88-1.43)                                  | 0.341          | 1.09 (0.86-1.40)                                | 0.478          |
| mRS ≥3 (n=307)            | 15.3%                  | 1.29 (0.95-1.76)                                  | 0.103          | 1.25 (0.91-1.71)                                | 0.171          |

\*From Cox model adjusted for baseline age, gender, race, country of enrollment, current smoking, atrial fibrillation, diabetes, hypertension, hyperlipidemia, prior stroke, randomization arm, days from qualifying stroke to enrollment, and TOAST classification of the qualifying stroke.
