# Supplementary material for: Disability and Recurrent Stroke Among Participants in Stroke Prevention Trials
Source: PubMed Central journal article supplement (PMC11259901; doi:10.1001/jamanetworkopen.2024.23677), 2024-07-19
Supplement: jamanetwopen-e2423677-s002.pdf [file jamanetwopen-e2423677-s002.pdf]

## Data Sharing Statement

de Havenon. Disability and Recurrent Stroke Among Participants in Stroke Prevention Trials. *JAMA Netw Open*. Published July 19, 2024. doi:10.1001/jamanetworkopen.2024.23677

### Data

**Data available:** Yes

**Data types:** Deidentified participant data

**How to access data:** Data for the IRIS trial can be requested here:

<https://www.ninds.nih.gov/current-research/research-funded-ninds/clinical-research/archived-clinical-research-datasets> Data for the PProFESS trial can be requested here:

<https://search.vivli.org/studyDetails/fromSearch/10ba6524-d58c-4d92-899b-b87a9fc8671a>

**When available:** beginning date: 02-23-2024

### Supporting Documents

**Document types:** None

### Additional Information

**Who can access the data:** Researchers whose proposed use of the data has been approved

**Types of analyses:** Broadly available to qualified researchers

**Mechanisms of data availability:** Without investigator support, after approval of a proposal, and with a signed data access agreement
